# Supplementary material for: Influence of floodplains and groundwater dynamics on the present-day climate simulated by the CNRM climate model
Source: Copernicus journal article supplement (doi:10.5194/esd-16-729-2025), 2025-06-02
Supplement: Supplementary file 1 [file esd-16-729-2025-supplement.pdf]

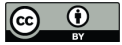

*Supplement of*

**Influence of floodplains and groundwater dynamics on the present-day climate simulated by the CNRM climate model**

**Bertrand Decharme and Jeanne Colin**

*Correspondence to:* Bertrand Decharme ([bertrand.decharme@meteo.fr](mailto:bertrand.decharme@meteo.fr))

The copyright of individual parts of the supplement might differ from the article licence.

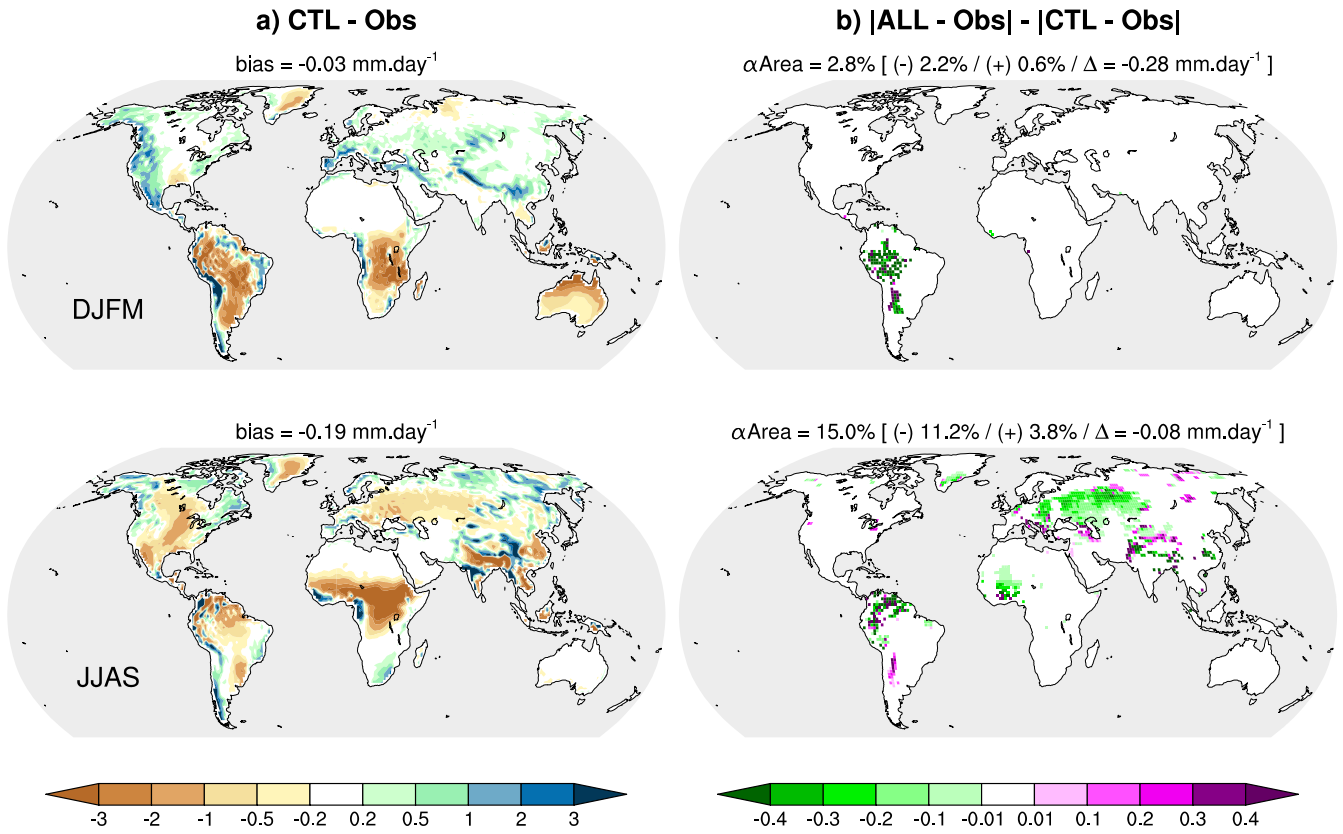

**Figure S1.** Observed vs. simulated precipitation over the 1980–2014 period as in Figure 11a but for extended boreal winter (DJFM) and summer (JJAS) : **(a)** The CTL ensemble mean bias compared to observations ; and **(b)** Differences between the CTL and ALL absolute biases over regions with statistically significant difference between CTL and ALL at a 95% level of confidence.

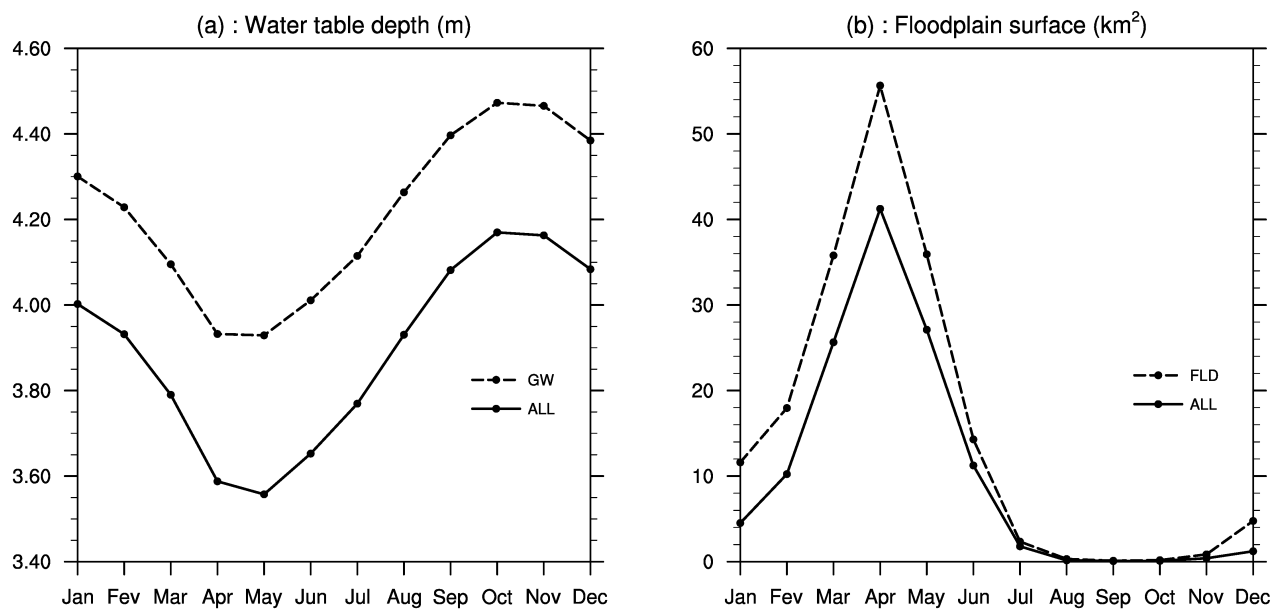

**Figure S2.** (a) : Water table depth ( $m$ ) mean seasonal cycle averaged over the  $[15-60^{\circ}E ; 40-60^{\circ}N]$  box of Figures 8 and 9 for GW and ALL simulations. (b) : Floodplain surface ( $km^2$ ) mean seasonal cycle averaged over the same box, for FLD and ALL.)

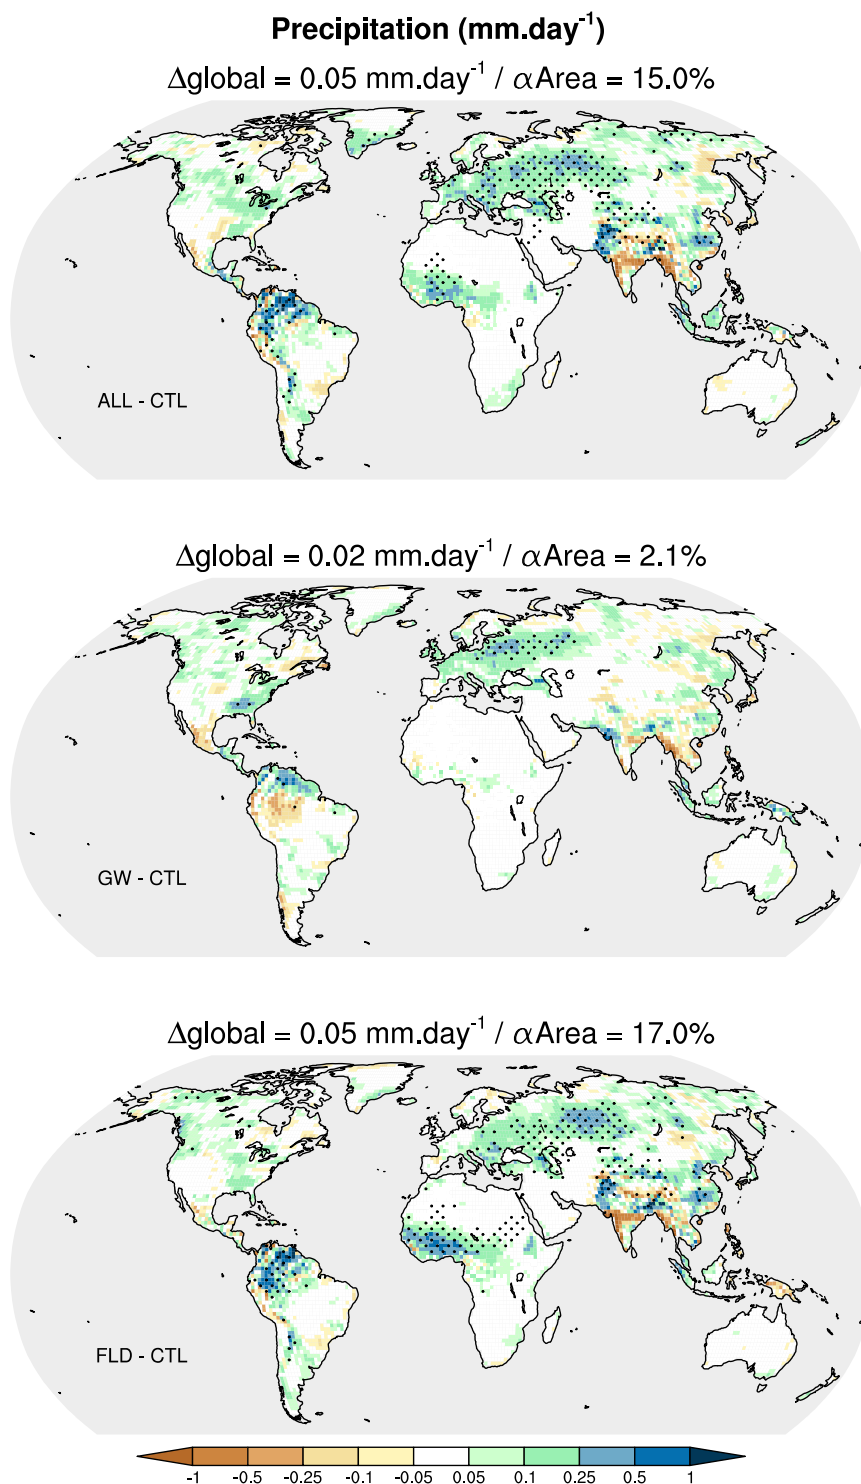

**Figure S3.** Impact of groundwater and floodplains on simulated extended boreal summer (June to September) precipitation over the 1980–2014 period, as in Figure 10a.

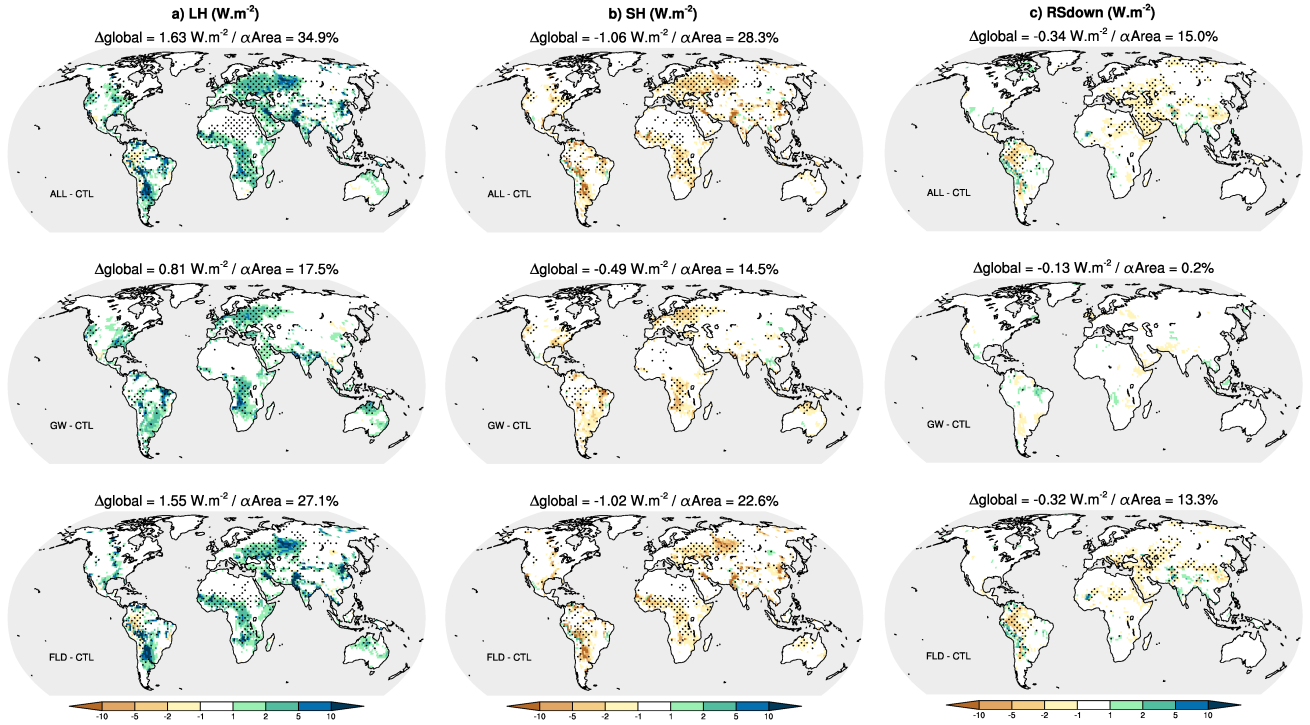

**Figure S4.** Impact of groundwater and floodplains on (a) surface latent heat flux (b) surface sensible heat flux and (c) downward surface solar radiation over the 1980–2014 period as in Figure 10b.

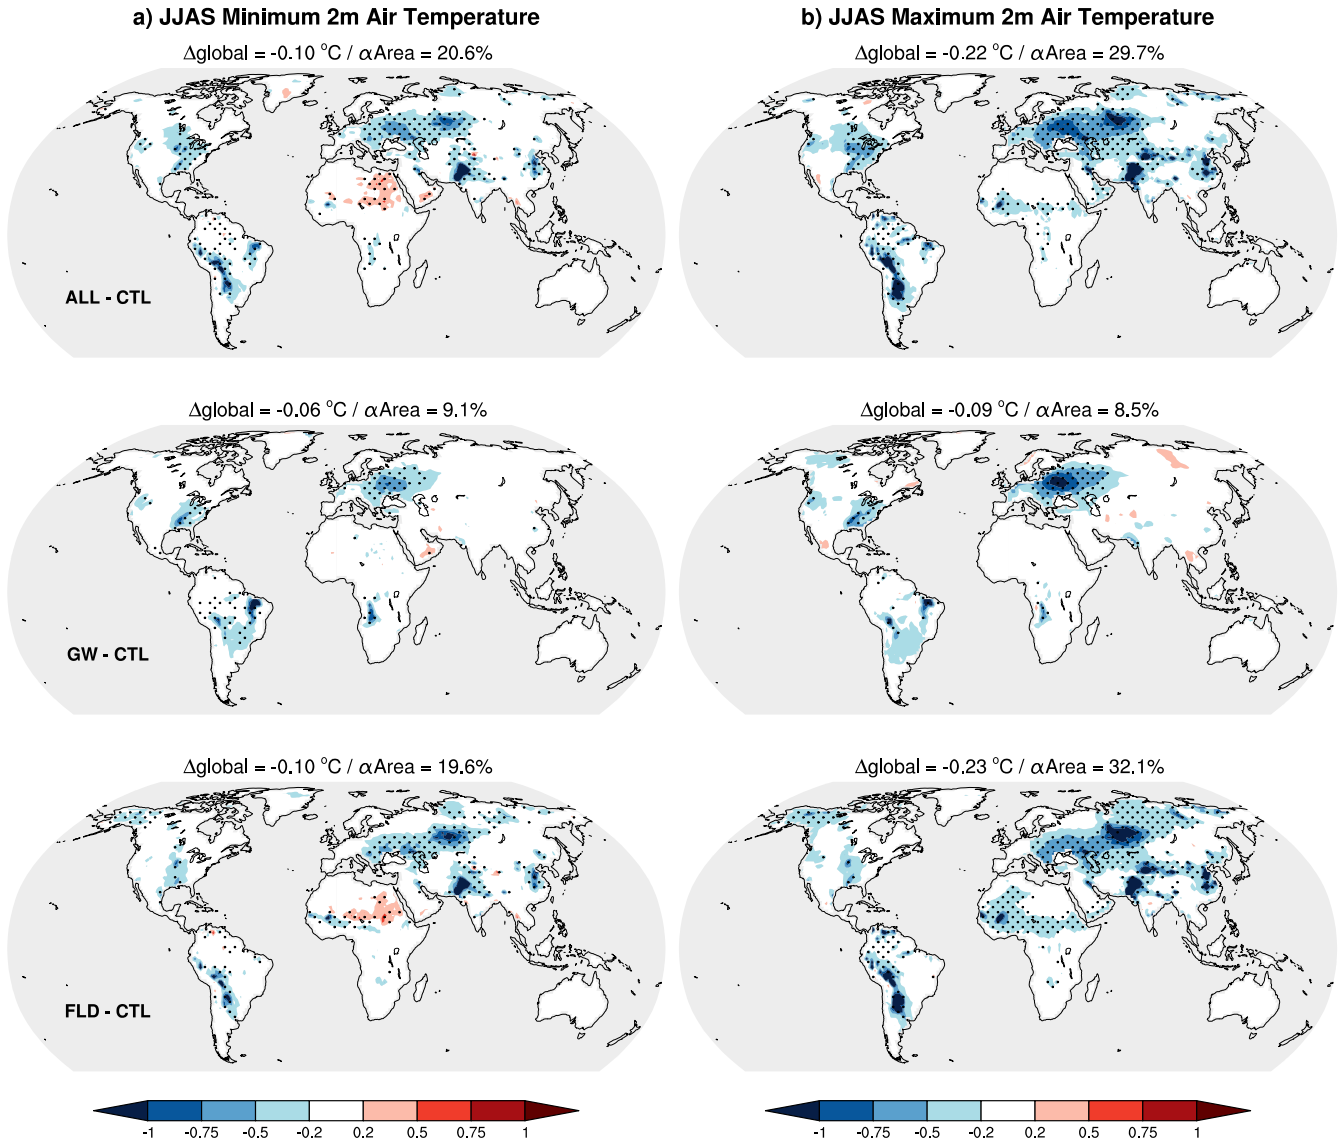

**Figure S5.** Impact of groundwater and floodplains on simulated extended boreal summer (a) daily-minimum and (b) daily-maximum mean monthly 2m air temperature over the 1980–2014 period as in Figure Figure 10b.

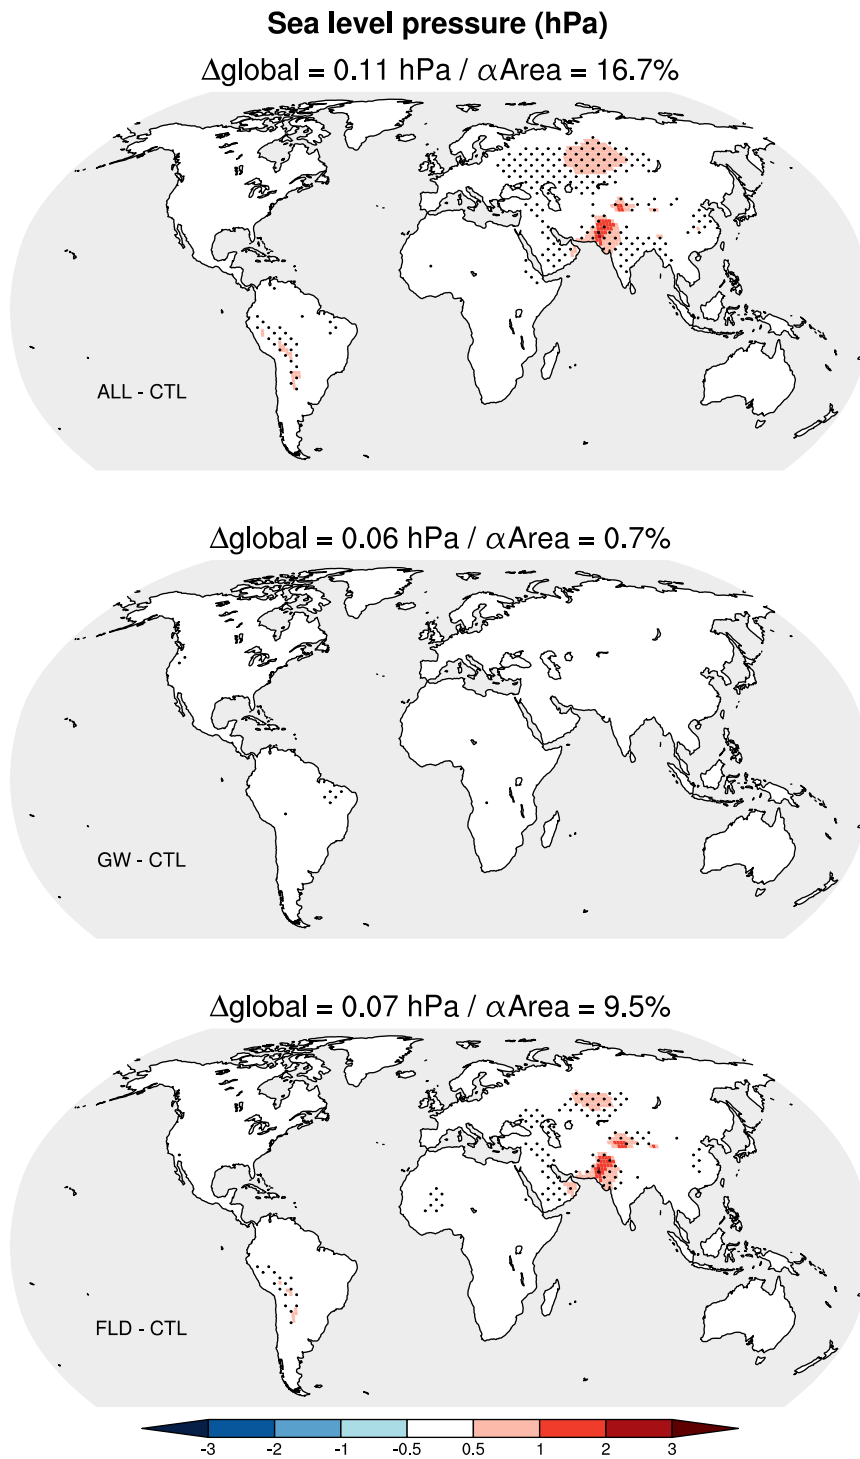

**Figure S6.** Impact of groundwater and floodplains on the boreal extended summer simulated sea level pressure over the 1980–2014 period, as in Figure 10a.

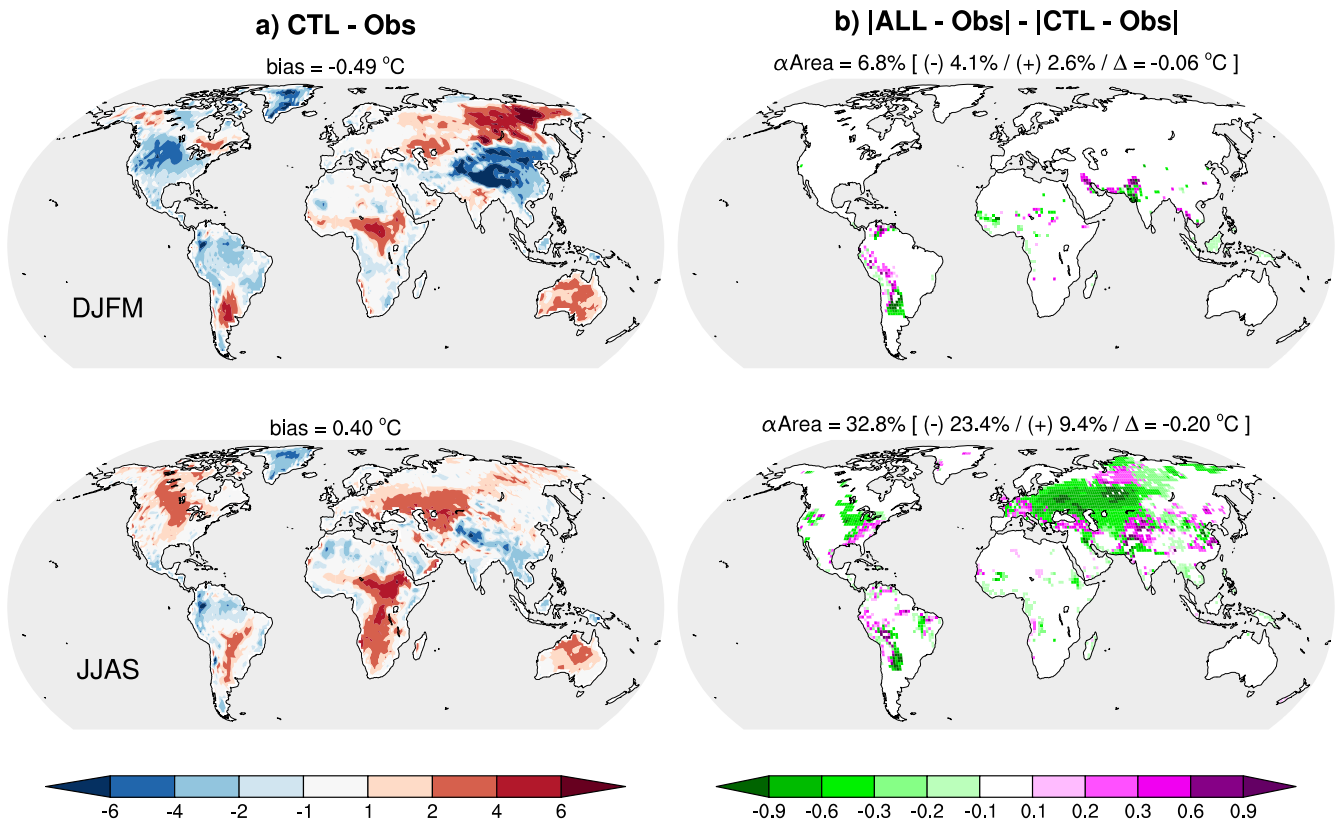

**Figure S7.** As in Figure S1 but for observed vs. simulated mean 2m air temperature according to Figure 11b.



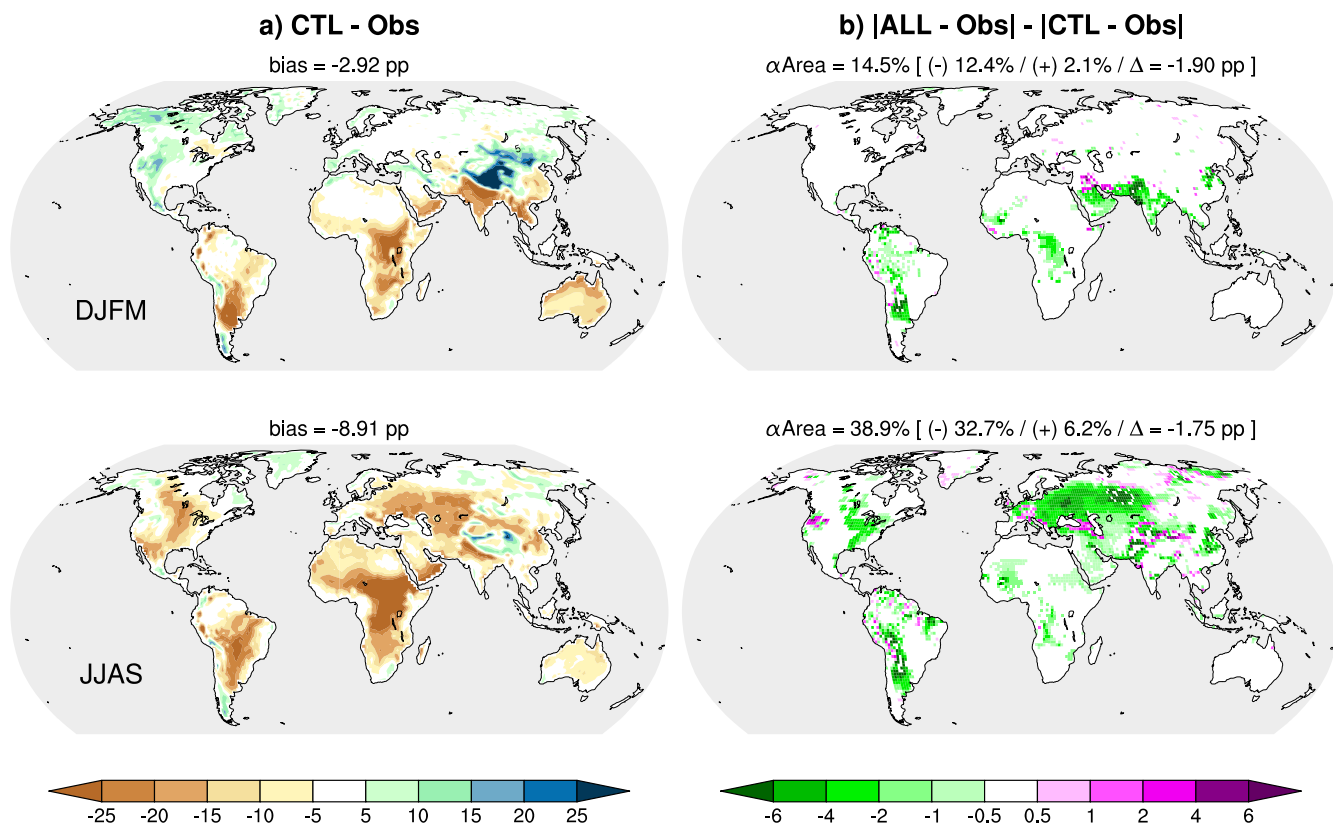

**Figure S8.** As in Figure S1 but for observed vs. simulated mean 2m air relative humidity according to Figure 11a.

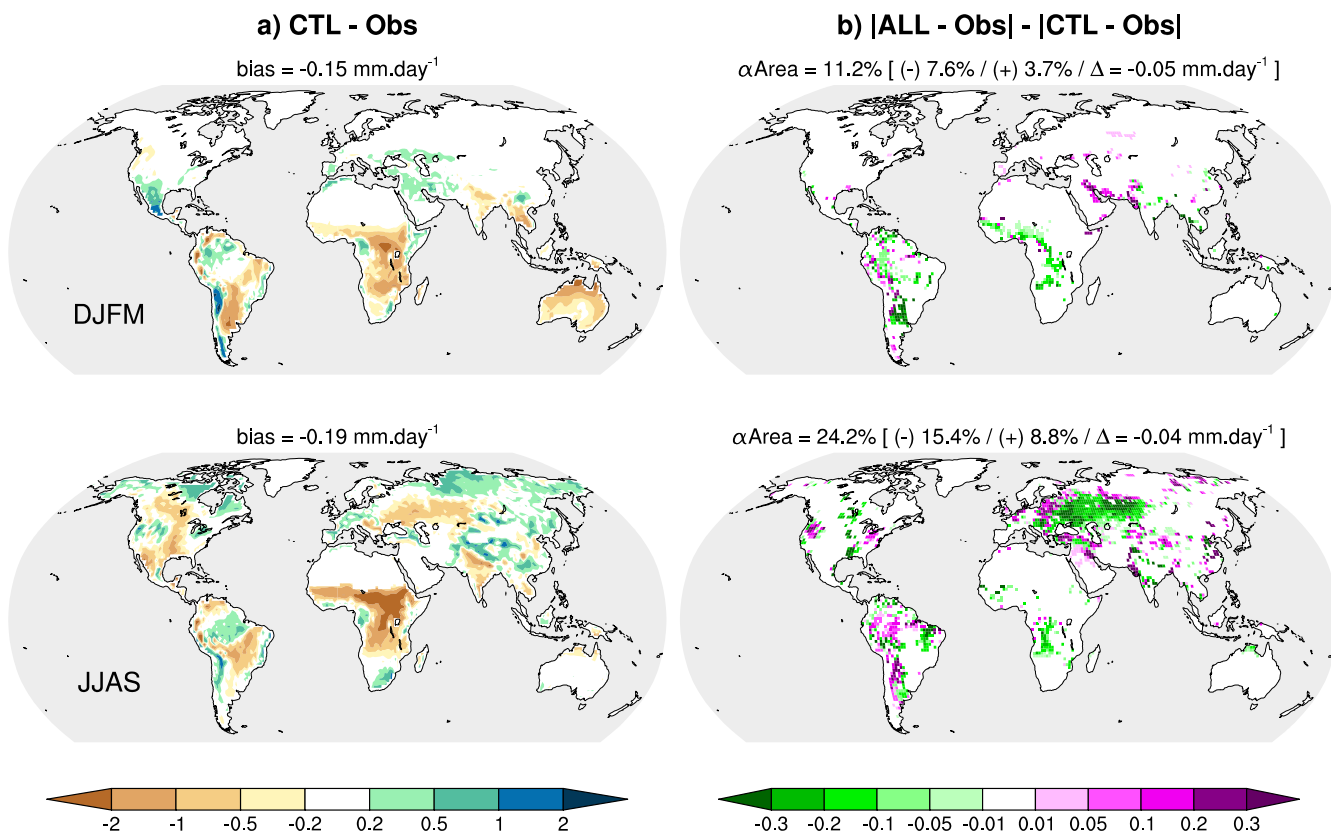

**Figure S9.** As in Figure S1 but for observed vs. simulated mean land surface evapotranspiration according to Figure 12b.
